# Supplementary material for: How Far Can Nature-Based Solutions Increase Water Supply Resilience to Climate Change in One of the Most Important Brazilian Watersheds?
Source: MDPI journal article supplement (doi:10.3390/earth3030042), 2022-06-22
Supplement: s1 [file s1]

Archive with 1 entries (1 files):
- earth-1691701-supplementary.pdf
